# Supplementary material for: Prediction of Partition Coefficients in SDS Micelles by DFT Calculations
Source: MDPI journal article supplement (doi:10.3390/sym13091750), 2021-09-19
Supplement: s1 [file s1]

# SUPPORTING INFORMATION

## Prediction of Partition Coefficients in SDS micelles by DFT Calculations

Leila Saranjam<sup>1</sup>, Elisabet Fuguet<sup>2</sup>, Miroslava Nedyalkova<sup>3</sup>, Vasil Simeonov<sup>3</sup>, Francesc Mas<sup>1</sup>, Sergio Madurga<sup>1,\*</sup>

<sup>1</sup> Department of Material Science and Physical Chemistry & Research Institute of Theoretical and Computational Chemistry (IQTUB), University of Barcelona, Barcelona, Spain; [leila.saranjam87@gmail.com](mailto:leila.saranjam87@gmail.com); [fmas@ub.edu](mailto:fmas@ub.edu)

<sup>2</sup> Department of Chemical Engineering and Analytical Chemistry and Institute of Biomedicine (IBUB), University of Barcelona, Barcelona, Spain; [elifuguetj@ub.edu](mailto:elifuguetj@ub.edu)

<sup>3</sup> Faculty of Chemistry and Pharmacy, University of Sofia "St. Kl. Ohridski", Sofia, Bulgaria; [mici345@yahoo.com](mailto:mici345@yahoo.com); [vsimeonov@chem.uni-sofia.bg](mailto:vsimeonov@chem.uni-sofia.bg)

\*Correspondence: [s.madurga@ub.edu](mailto:s.madurga@ub.edu)

| Iupac name  | Cas number | Formula                            | Structure                                                                             |
|-------------|------------|------------------------------------|---------------------------------------------------------------------------------------|
| Propan-1-ol | 71-23-8    | C <sub>3</sub> H <sub>8</sub> O    | 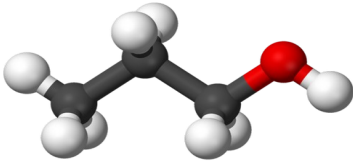 |
| Propan-2-ol | 67-63-0    | C <sub>3</sub> H <sub>8</sub> O    |  |
| Decan-1-ol  | 112-30-1   | C <sub>10</sub> H <sub>21</sub> OH |  |
| Methanol    | 67-56-1    | CH <sub>4</sub> O                  |  |

|                          |          |              |                                                                                       |
|--------------------------|----------|--------------|---------------------------------------------------------------------------------------|
| Octan-1-ol               | 111-87-5 | $C_8H_{18}O$ | 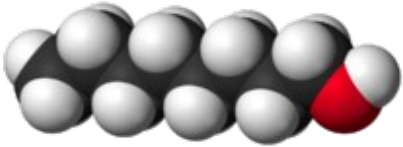   |
| Ethane-1,2-diol          | 107-21-1 | $C_2H_6O_2$  |    |
| (Methanesulfinyl)methane | 67-68-5  | $C_2H_6OS$   |    |
| Cyclohexane              | 110-82-7 | $C_6H_{12}$  |   |
| Acetic acid              | 64-19-7  | $C_2H_4O_2$  |  |
| Acetone                  | 67-64-1  | $C_3H_6O$    |  |
| (Ethylsulfanyl)ethane    | 352-93-2 | $C_4H_{10}S$ |  |
| Formic acid              | 64-18-6  | $CH_2O_2$    |  |

|          |          |                |                                                                                     |
|----------|----------|----------------|-------------------------------------------------------------------------------------|
| Heptane  | 142-82-5 | $C_7H_{16}$    | 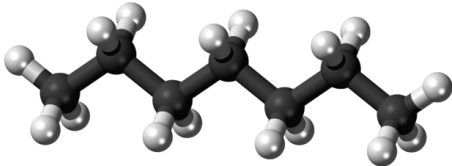  |
| Dodecane | 112-40-3 | $C_{12}H_{26}$ |   |
| Pyridine | 110-86-1 | $C_5H_5N$      |  |

**Figure S1.** Chemical structures of the solvents used in DFT calculations.

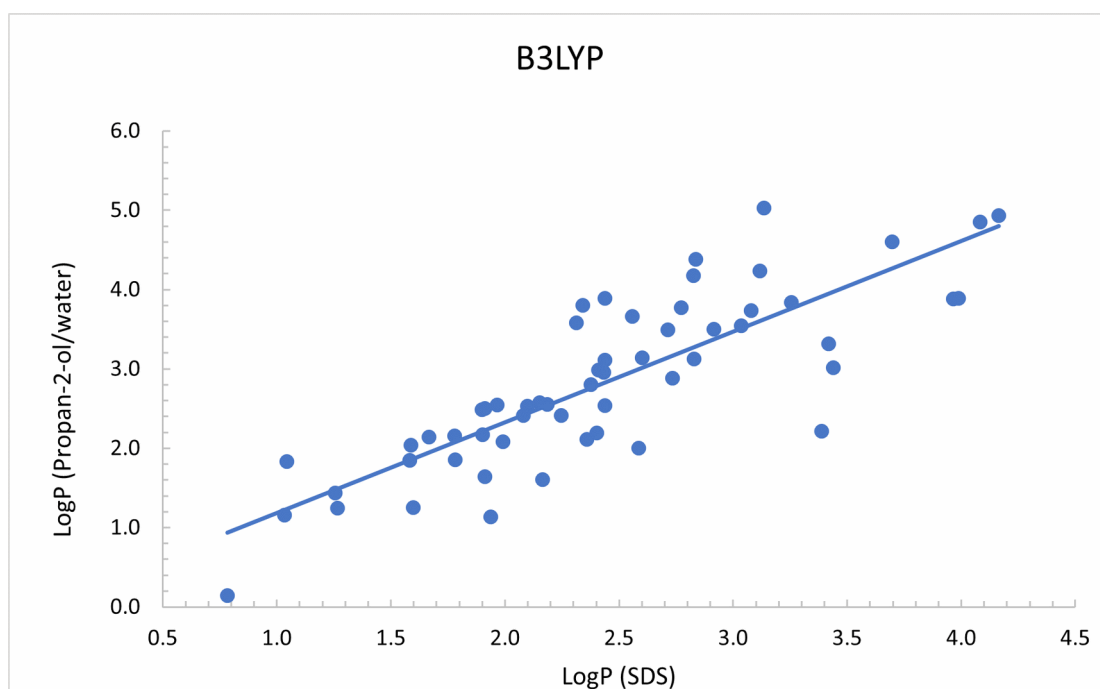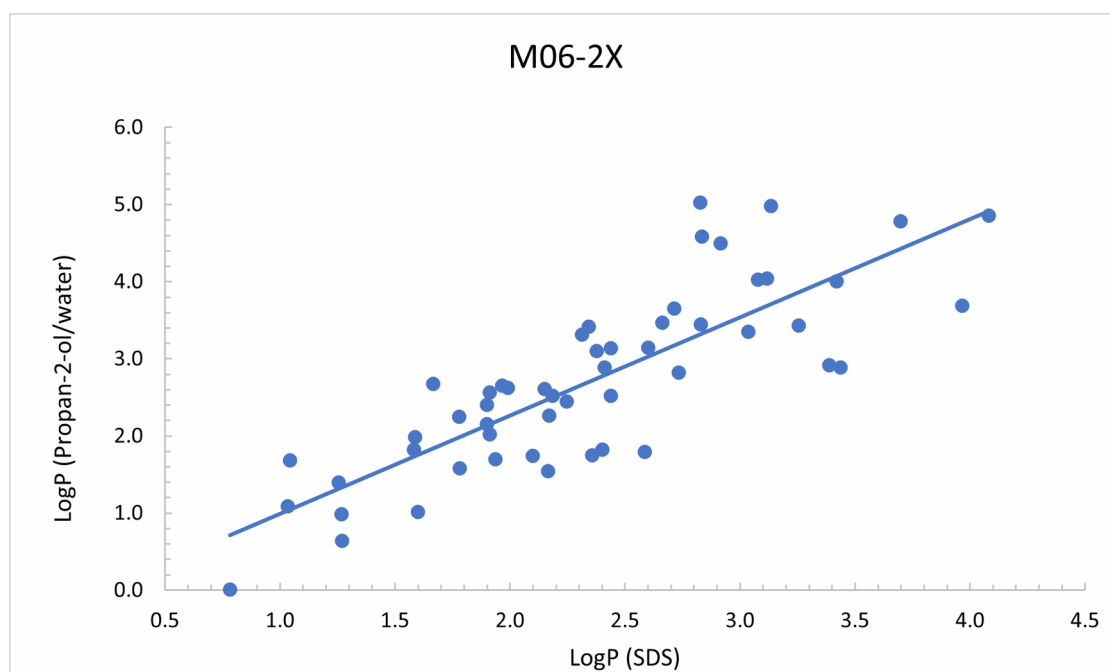

**Figure S2.** Comparison of the calculated logP in propan-2-ol/water with the experimental logP in SDS micelle system. The (a) shows the B3LYP model results and the (b) shows the M06-2X results.

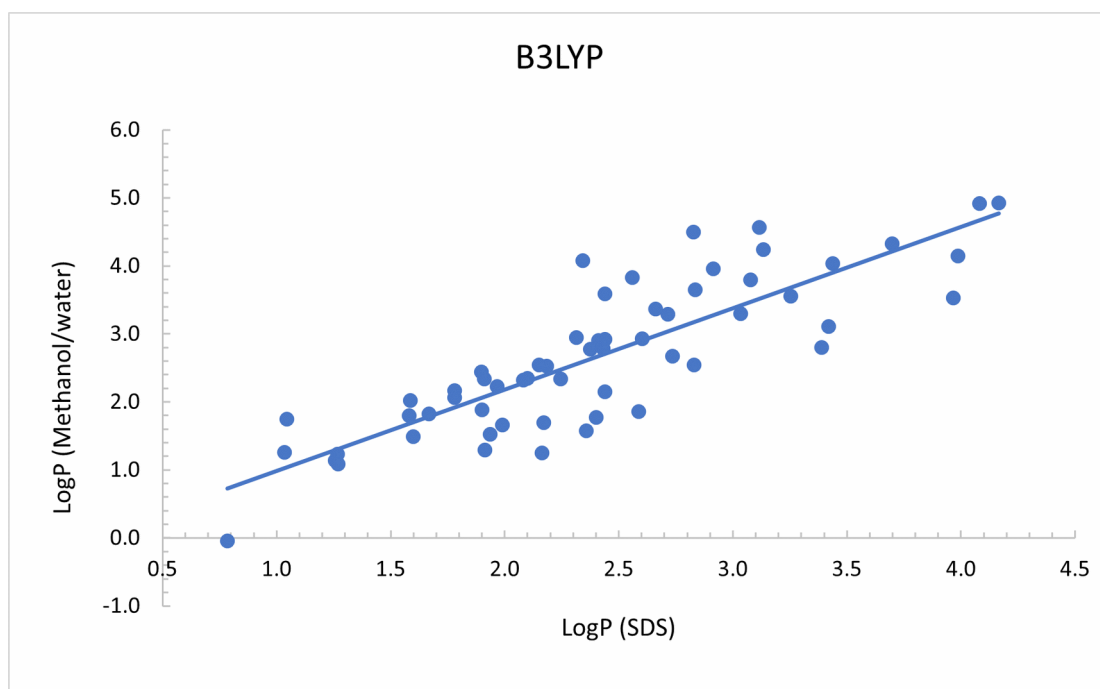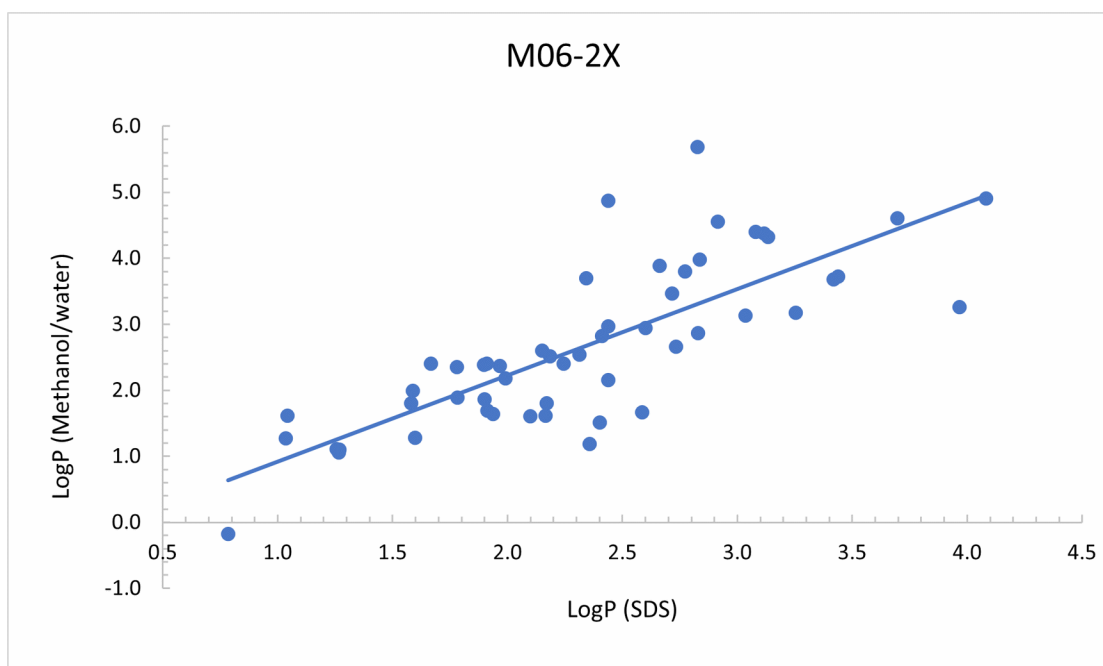

**Figure S3.** Comparison of the calculated logP in methanol/water with the experimental logP in SDS micelle system. The (a) shows the B3LYP model results and the (b) shows the M06-2X results.

| <b>Compound</b>           | <b>Log P<br/>octanol/water</b> | <b>Log P Propan-1-<br/>ol/water</b> | <b>Log P<br/>Propan-2-ol/water</b> | <b>Log P<br/>Methanol/water</b> |
|---------------------------|--------------------------------|-------------------------------------|------------------------------------|---------------------------------|
| Ethylbenzene              | 3.03                           | 3.40                                | 3.49                               | 3.28                            |
| Propylbenzene             | NA                             | NA                                  | NA                                 | NA                              |
| Butylbenzene              | 4.02                           | 4.48                                | 4.60                               | 4.32                            |
| 1-phenylethanone          | 1.58                           | 2.32                                | 2.41                               | 2.31                            |
| 1-phenylpropan-1-one      | 2.22                           | 2.95                                | 2.98                               | 2.90                            |
| 1-phenylbutan-1-one       | 2.28                           | 3.25                                | NA                                 | NA                              |
| 1-phenylpentan-1-one      | NA                             | NA                                  | NA                                 | NA                              |
| 1-phenylheptan-1-one      | 3.91                           | 4.80                                | 4.93                               | 4.92                            |
| Furan                     | 0.89                           | 1.28                                | 1.43                               | 1.41                            |
| 2-nitroaniline            | 0.54                           | 1.43                                | 1.60                               | 1.25                            |
| 2,3-benzofuran            | 1.90                           | 2.37                                | 2.54                               | 2.14                            |
| Diphenylmethanone         | 2.88                           | 3.70                                | 3.83                               | 3.55                            |
| Benzamide                 | 0.16                           | 1.23                                | 1.25                               | 1.49                            |
| 4-chloroaniline           | 1.78                           | 2.48                                | 2.55                               | 2.52                            |
| 2,3-dimethylphenol        | 2.60                           | 3.16                                | 3.58                               | 2.94                            |
| Naphthalen-2-ol           | 1.94                           | 2.73                                | 2.88                               | 2.67                            |
| 4-aminobenzamide          | -0.87                          | 0.63                                | NA                                 | 1.08                            |
| 3-methylphenol            | 1.57                           | 2.26                                | 2.54                               | 2.23                            |
| 2,4-dimethylphenol        | 1.98                           | 2.69                                | 2.79                               | 2.77                            |
| Naphthalene               | 3.01                           | 3.47                                | 3.54                               | 3.29                            |
| Pyrimidine                | -0.47                          | 0.04                                | 0.14                               | -0.04                           |
| Benzaldehyde              | 1.38                           | 2.02                                | 2.17                               | 1.88                            |
| 3-chloroaniline           | 1.81                           | 2.50                                | 2.57                               | 2.54                            |
| Pyrrole                   | 1.20                           | 1.76                                | 1.83                               | 1.74                            |
| 3-nitroaniline            | 0.47                           | 1.44                                | 1.64                               | 1.29                            |
| 4-chlorophenol            | 1.61                           | 2.31                                | 2.41                               | 2.33                            |
| Phenol                    | 1.10                           | 1.77                                | 1.84                               | 1.79                            |
| Methylbenzoate            | 1.003                          | 1.94                                | 2.19                               | 1.77                            |
| Bromobenzene              | 2.73                           | 3.06                                | 3.14                               | 2.92                            |
| 1,4-xylene                | 3.17                           | 3.69                                | 3.77                               | NA                              |
| Benzene-1,3-diol          | 0.16                           | 1.17                                | 1.24                               | 1.23                            |
| 2-methylaniline           | 1.73                           | 2.41                                | 2.48                               | 2.43                            |
| 1-methoxy-2-nitrobenzene  | 0.80                           | 1.80                                | NA                                 | 1.69                            |
| N-4-chlorophenylacetamide | 1.76                           | 2.82                                | 2.96                               | 2.78                            |

|                                    |       |      |       |       |
|------------------------------------|-------|------|-------|-------|
| Aniline                            | 1.32  | 1.98 | 2.04  | 2.022 |
| Nitrobenzene                       | 1.22  | 1.89 | 2.08  | 1.66  |
| Chlorobenzene                      | 2.68  | 3.03 | 3.10  | 2.92  |
| <i>N</i> -phenylacetamide          | 0.89  | 2.02 | 2.15  | 1.16  |
| 4-nitroaniline                     | -0.22 | 1.09 | 1.13  | 1.52  |
| Anisole                            | 1.92  | 2.42 | 2.53  | 2.34  |
| Benzonitrile                       | 1.77  | 2.40 | 2.49  | 2.33  |
| 1-ethyl-4-nitrobenzene             | 2.13  | 2.87 | 3.12  | 2.54  |
| 1-methoxy-4-nitrobenzene           | 0.88  | 1.80 | 2.11  | 1.57  |
| <i>N,N</i> -diethyl-4-nitroaniline | 1.90  | 3.10 | 3.31  | 3.10  |
| Benzyl benzoate                    | 2.26  | 3.56 | 3.88  | 3.53  |
| Caffeine                           | 0.86  | 1.93 | 2.14  | 1.82  |
| Corticosterone                     | 1.49  | 3.88 | 3.88  | 4.14  |
| Cortisone                          | -0.88 | 3.09 | 2.21  | 2.80  |
| $\beta$ -Estradiol                 | 3.44  | 4.78 | 4.85  | 4.91  |
| Estriol                            | 2.40  | 4.03 | 4.23  | 4.56  |
| Cortisol                           | 0.48  | 3.01 | 3.01  | 4.03  |
| Hydroquinone                       | 0.05  | 1.07 | 1.15  | 1.28  |
| Quinoline                          | 1.36  | 1.94 | 2.004 | 1.85  |
| Atrazine                           | 3.12  | 4.06 | 4.38  | 3.64  |
| Diuron                             | 2.28  | 3.61 | 3.49  | 3.96  |
| Fluometuron                        | 2.56  | 3.54 | 3.66  | 3.82  |
| Isoproturon                        | NA    | 4.54 | 4.17  | 4.50  |
| Linuron                            | 2.25  | 3.70 | 3.73  | 3.79  |
| Metobromuron                       | NA    | 3.23 | NA    | 3.36  |
| Monuron                            | 1.91  | 3.47 | 3.80  | 4.07  |
| Metoxuron                          | 1.88  | 3.59 | 3.89  | 3.59  |
| Phenyl urea                        | 0.47  | 1.86 | 1.85  | 2.06  |
| Propazine                          | 3.61  | 4.64 | 5.03  | 4.24  |

**Table S1.** Predicted partition coefficients for octanol/water, propan-1-ol/water, propan-2-ol/water and methanol/water with B3LYP calculations. NA indicates that partition coefficient could be not calculated because of absence of true minimum.

| <b>Compound</b>          | <b>Log P<br/>octanol/water</b> | <b>Log P Propan-1-<br/>ol/water</b> | <b>Log P<br/>Propan-2-ol/water</b> | <b>Log P<br/>Methanol/water</b> |
|--------------------------|--------------------------------|-------------------------------------|------------------------------------|---------------------------------|
| Ethylbenzene             | 2.95                           | 3.39                                | 3.65                               | 3.46                            |
| Propylbenzene            | 3.35                           | 3.82                                | NA                                 | NA                              |
| Butylbenzene             | 3.92                           | 4.44                                | 4.78                               | 4.60                            |
| 1-phenylethanone         | 1.13                           | 1.89                                | NA                                 | NA                              |
| 1-phenylpropan-1-one     | 2.25                           | 2.99                                | 2.88                               | 2.82                            |
| 1-phenylbutan-1-one      | NA                             | NA                                  | NA                                 | NA                              |
| 1-phenylpentan-1-one     | 3.42                           | 4.39                                | NA                                 | NA                              |
| 1-phenylheptan-1-one     | 4.17                           | 4.82                                | NA                                 | NA                              |
| Furan                    | 0.90                           | 1.31                                | 1.39                               | 1.10                            |
| 2-nitroaniline           | 0.40                           | 1.33                                | 1.54                               | 1.61                            |
| 2,3-benzofuran           | 1.83                           | 2.34                                | 2.52                               | 2.15                            |
| Diphenylmethanone        | 2.57                           | 3.28                                | 3.42                               | 3.17                            |
| Benzamide                | -0.12                          | NA                                  | 1.01                               | 1.27                            |
| 4-chloroaniline          | 1.75                           | 2.49                                | 2.52                               | 2.51                            |
| 2,3-dimethylphenol       | 2.34                           | 2.37                                | 3.31                               | 2.53                            |
| Naphthalen-2-ol          | 1.83                           | 2.700                               | 2.82                               | 2.66                            |
| 4-aminobenzamide         | 1.44                           | 0.48                                | 0.64                               | 1.09                            |
| 3-methylphenol           | 1.42                           | 2.15                                | 2.65                               | 2.36                            |
| 2,4-dimethylphenol       | NA                             | NA                                  | 3.10                               | NA                              |
| Naphthalene              | 2.92                           | 3.45                                | 3.34                               | 3.13                            |
| Pyrimidine               | -0.49                          | 0.01                                | 0.01                               | -0.17                           |
| Benzaldehyde             | 1.34                           | 2.005                               | 2.15                               | 1.26                            |
| 3-chloroaniline          | 1.74                           | 2.47                                | 2.60                               | 2.59                            |
| Pyrrole                  | 1.21                           | 1.82                                | 1.68                               | 1.61                            |
| 3-nitroaniline           | 1.05                           | 2.02                                | 2.02                               | 1.68                            |
| 4-chlorophenol           | 1.53                           | 2.27                                | 2.44                               | 2.40                            |
| Phenol                   | 1.02                           | 1.74                                | 1.82                               | 1.80                            |
| Methylbenzoate           | 0.82                           | 1.81                                | 1.82                               | 1.51                            |
| Bromobenzene             | 2.75                           | 3.08                                | 3.14                               | 2.94                            |
| 1,4-xylene               | 3.70                           | 3.56                                | NA                                 | 3.79                            |
| Benzene-1,3-diol         | 0.05                           | 1.11                                | 0.98                               | 1.06                            |
| 2-methylaniline          | 1.67                           | 2.40                                | 2.40                               | 2.38                            |
| 1-methoxy-2-nitrobenzene | 1.01                           | NA                                  | 2.26                               | 1.80                            |



|                                    |       |      |       |      |
|------------------------------------|-------|------|-------|------|
| <i>N</i> -4-chlorophenylacetamide  | NA    | NA   | NA    | NA   |
| Aniline                            | 1.26  | 1.98 | 1.98  | 1.99 |
| Nitrobenzene                       | 1.54  | 2.18 | 2.62  | 2.17 |
| Chlorobenzene                      | 2.66  | 3.04 | 3.14  | 2.97 |
| <i>N</i> -phenylacetamide          | 0.82  | 1.88 | 2.25  | 2.34 |
| 4-nitroaniline                     | 0.28  | 1.44 | 1.69  | 1.63 |
| Anisole                            | 1.93  | 2.37 | 1.74  | 1.60 |
| Benzonitrile                       | 1.83  | 2.46 | 2.56  | 2.40 |
| 1-ethyl-4-nitrobenzene             | 2.27  | 3.04 | 3.44  | 2.86 |
| 1-methoxy-4-nitrobenzene           | 1.06  | 1.93 | 1.74  | 1.18 |
| <i>N,N</i> -diethyl-4-nitroaniline | 2.52  | 3.59 | 4.002 | 3.67 |
| Benzyl benzoate                    | 1.92  | 3.01 | 3.69  | 3.26 |
| Caffeine                           | 1.15  | 2.49 | 2.67  | 2.40 |
| Corticosterone                     | NA    | NA   | NA    | NA   |
| Cortisone                          | NA    | 2.83 | 2.92  | NA   |
| $\beta$ -Estradiol                 | 3.27  | 4.64 | 4.85  | 4.90 |
| Estriol                            | 2.43  | 4.16 | 4.03  | 4.37 |
| Cortisol                           | 0.72  | 3.23 | 2.89  | 3.71 |
| Hydroquinone                       | -0.12 | 0.96 | 1.09  | 1.26 |
| Quinoline                          | 1.27  | 1.89 | 1.79  | 1.66 |
| Atrazine                           | 3.37  | 4.31 | 4.58  | 3.97 |
| Diuron                             | 2.35  | 4.50 | 4.49  | 4.55 |
| Fluometuron                        | NA    | NA   | NA    | NA   |
| Isoproturon                        | 2.89  | 4.55 | 5.02  | 5.68 |
| Linuron                            | 2.35  | 3.96 | 4.02  | 4.39 |
| Metobromuron                       | 2.04  | 3.12 | 3.46  | 3.88 |
| Monuron                            | 2.22  | 3.63 | 3.41  | 3.69 |
| Metoxuron                          | 1.65  | 4.03 | NA    | 4.87 |
| Phenyl urea                        | 0.38  | 1.56 | 1.58  | 1.88 |
| Propazine                          | 3.57  | 4.65 | 4.98  | 4.32 |

**Table S2.** Predicted partition coefficients for octanol/water, propan-1-ol/water, propan-2-ol/water and methanol/water with M06-2X calculations. NA indicates that partition coefficient could be not calculated because of absence of true minimum.

|                                                                                   | Coefficient | Standar Error | P-value | Lower 95% | Upper 95 % | F     | Significance F | R <sup>2</sup> |
|-----------------------------------------------------------------------------------|-------------|---------------|---------|-----------|------------|-------|----------------|----------------|
| <b>Calculated logP propan-1-ol/water vs Exp. logP of SDS micelles with B3LYP</b>  |             |               |         |           |            |       |                |                |
| Intercept                                                                         | -0.21       | 0.24          | 0.38    | -0.68     | 0.27       |       |                |                |
| x                                                                                 | 1.19        | 0.09          | 1.2E-18 | 1.01      | 1.38       | 163.6 | 1.2E-18        | 0.73           |
| <b>Calculated logP propan-1-ol/water vs Exp. logP of SDS micelles with M06-2X</b> |             |               |         |           |            |       |                |                |
| Intercept                                                                         | -0.19       | 0.28          | 0.50    | -0.74     | 0.37       |       |                |                |
| x                                                                                 | 1.20        | 0.11          | 3.0E-15 | 0.98      | 1.42       | 120.3 | 3.0E-15        | 0.69           |
| <b>Calculated logP propan-2-ol/water vs Exp. logP of SDS micelles with B3LYP</b>  |             |               |         |           |            |       |                |                |
| Intercept                                                                         | 0.04        | 0.27          | 0.87    | -0.49     | 0.58       |       |                |                |
| x                                                                                 | 1.14        | 0.10          | 2.1E-15 | 0.93      | 1.35       | 119.4 | 2.1E-15        | 0.68           |
| <b>Calculated logP propan-2-ol/water vs Exp. logP of SDS micelles with M06-2X</b> |             |               |         |           |            |       |                |                |
| Intercept                                                                         | -0.28       | 0.30          | 0.35    | -0.89     | 0.32       |       |                |                |
| x                                                                                 | 1.27        | 0.12          | 2.9E-14 | 1.03      | 1.52       | 109.0 | 2.9E-14        | 0.68           |
| <b>Calculated logP methanol/water vs Exp. logP of SDS micelles with B3LYP</b>     |             |               |         |           |            |       |                |                |
| Intercept                                                                         | -0.21       | 0.25          | 0.41    | -0.72     | 0.30       |       |                |                |
| x                                                                                 | 1.20        | 0.10          | 4.1E-17 | 0.99      | 1.40       | 142.1 | 4.1E-17        | 0.71           |
| <b>Calculated logP methanol/water vs Exp. logP of SDS micelles with M06-2X</b>    |             |               |         |           |            |       |                |                |
| Intercept                                                                         | -0.39       | 0.35          | 0.27    | -1.10     | 0.31       |       |                |                |
| x                                                                                 | 1.31        | 0.14          | 2.6E-12 | 1.02      | 1.60       | 83.5  | 2.6E-12        | 0.62           |
| <b>Calculated logP heptane/water vs Exp. logP of SDS micelles with B3LYP</b>      |             |               |         |           |            |       |                |                |
| Intercept                                                                         | -1.32       | 1.15          | 0.26    | -3.62     | 0.98       |       |                |                |
| x                                                                                 | 0.67        | 0.45          | 0.15    | -0.24     | 1.57       | 2.18  | 1.5E-01        | 0.04           |
| <b>Calculated logP heptane/water vs Exp. logP of SDS micelles with M06-2X</b>     |             |               |         |           |            |       |                |                |
| Intercept                                                                         | -1.99       | 1.21          | 0.11    | -4.41     | 0.44       |       |                |                |
| x                                                                                 | 0.92        | 0.47          | 0.06    | -0.02     | 1.87       | 3.83  | 5.6E-02        | 0.07           |
| <b>Calculated logP cyclohexane/water vs Exp. logP of SDS micelles with B3LYP</b>  |             |               |         |           |            |       |                |                |
| Intercept                                                                         | -1.33       | 1.16          | 0.26    | -3.66     | 1.00       |       |                |                |
| x                                                                                 | 0.64        | 0.46          | 0.16    | -0.27     | 1.55       | 1.99  | 1.6E-01        | 0.03           |
| <b>Calculated logP cyclohexane/water vs Exp. logP of SDS micelles with M06-2X</b> |             |               |         |           |            |       |                |                |
| Intercept                                                                         | -1.78       | 1.19          | 0.14    | -4.18     | 0.61       |       |                |                |
| x                                                                                 | 0.85        | 0.46          | 0.07    | -0.08     | 1.77       | 3.40  | 7.1E-02        | 0.06           |
| <b>Calculated logP N-dodecane/water vs Exp. logP of SDS micelles with B3LYP</b>   |             |               |         |           |            |       |                |                |
| Intercept                                                                         | -1.86       | 1.01          | 0.07    | -3.87     | 0.15       |       |                |                |
| x                                                                                 | 0.90        | 0.40          | 0.03    | 0.10      | 1.70       | 5.12  | 2.7E-02        | 0.08           |
| <b>Calculated logP N-dodecane/water vs Exp. logP of SDS micelles with M06-2X</b>  |             |               |         |           |            |       |                |                |
| Intercept                                                                         | -1.65       | 1.22          | 0.18    | -4.11     | 0.81       |       |                |                |

|   |      |      |      |       |      |      |         |      |
|---|------|------|------|-------|------|------|---------|------|
| x | 0.73 | 0.48 | 0.14 | -0.24 | 1.70 | 2.28 | 1.4E-01 | 0.04 |
|---|------|------|------|-------|------|------|---------|------|

**Calculated logP pyridine/water vs Exp. logP of SDS micelles with B3LYP**

|           |      |      |         |       |      |       |         |      |
|-----------|------|------|---------|-------|------|-------|---------|------|
| Intercept | 0.45 | 0.65 | 0.50    | -0.85 | 1.75 |       |         |      |
| x         | 0.97 | 0.25 | 3.2E-04 | 0.46  | 1.48 | 14.57 | 3.2E-04 | 0.20 |

**Calculated logP pyridine/water vs Exp. logP of SDS micelles with M06-2X**

|           |      |      |         |       |      |       |         |      |
|-----------|------|------|---------|-------|------|-------|---------|------|
| Intercept | 0.16 | 0.63 | 0.80    | -1.10 | 1.43 |       |         |      |
| x         | 1.13 | 0.24 | 2.4E-05 | 0.64  | 1.62 | 21.65 | 2.4E-05 | 0.30 |

**Calculated logP diethyl sulfide/water vs Exp. logP of SDS micelles with B3LYP**

|           |      |      |      |       |      |      |         |      |
|-----------|------|------|------|-------|------|------|---------|------|
| Intercept | 0.14 | 0.78 | 0.86 | -1.41 | 1.70 |      |         |      |
| x         | 0.88 | 0.30 | 0.01 | 0.28  | 1.49 | 8.45 | 5.1E-03 | 0.12 |

**Calculated logP diethyl sulfide/water vs Exp. logP of SDS micelles with M06-2SX**

|           |       |      |         |       |      |       |         |      |
|-----------|-------|------|---------|-------|------|-------|---------|------|
| Intercept | -0.48 | 0.81 | 0.56    | -2.09 | 1.14 |       |         |      |
| x         | 1.18  | 0.31 | 3.7E-04 | 0.56  | 1.80 | 14.54 | 3.7E-04 | 0.22 |

**Calculated logP acetic acid/water vs Exp. logP of SDS micelles with B3LYP**

|           |       |      |      |       |       |      |         |      |
|-----------|-------|------|------|-------|-------|------|---------|------|
| Intercept | -1.80 | 0.86 | 0.04 | -3.52 | -0.08 |      |         |      |
| x         | 0.45  | 0.34 | 0.18 | -0.22 | 1.13  | 1.84 | 1.8E-01 | 0.03 |

**Calculated logP acetic acid/water vs Exp. logP of SDS micelles with M06-2X**

|           |       |      |         |       |       |      |         |      |
|-----------|-------|------|---------|-------|-------|------|---------|------|
| Intercept | -2.46 | 0.84 | 4.9E-03 | -4.14 | -0.78 |      |         |      |
| x         | 0.74  | 0.32 | 0.03    | 0.09  | 1.38  | 5.18 | 2.7E-02 | 0.09 |

**Calculated logP decan-1-ol/water vs Exp. logP of SDS micelles with B3LYP**

|           |       |      |         |       |      |       |         |      |
|-----------|-------|------|---------|-------|------|-------|---------|------|
| Intercept | -0.87 | 0.47 | 0.07    | -1.81 | 0.08 |       |         |      |
| x         | 0.83  | 0.18 | 3.1E-05 | 0.46  | 1.20 | 20.39 | 3.1E-05 | 0.26 |

**Calculated logP decan-1-ol/water vs Exp. logP of SDS micelles with M06-2X**

|           |       |      |         |       |       |       |         |      |
|-----------|-------|------|---------|-------|-------|-------|---------|------|
| Intercept | -1.19 | 0.48 | 0.02    | -2.16 | -0.23 |       |         |      |
| x         | 0.99  | 0.19 | 5.3E-06 | 0.60  | 1.38  | 25.85 | 5.3E-06 | 0.34 |

**Calculated logP octanol/water vs Exp. logP of SDS micelles with B3LYP**

|           |       |      |         |       |      |       |         |      |
|-----------|-------|------|---------|-------|------|-------|---------|------|
| Intercept | -0.53 | 0.37 | 0.17    | -1.28 | 0.22 |       |         |      |
| x         | 0.91  | 0.15 | 8.4E-08 | 0.61  | 1.20 | 37.72 | 8.4E-08 | 0.40 |

**Calculated logP octanol/water vs Exp. logP of SDS micelles with M06-2X**

|           |       |      |         |       |       |       |         |      |
|-----------|-------|------|---------|-------|-------|-------|---------|------|
| Intercept | -1.00 | 0.33 | 4.1E-03 | -1.67 | -0.33 |       |         |      |
| x         | 1.16  | 0.13 | 5.0E-12 | 0.90  | 1.42  | 77.57 | 5.0E-12 | 0.48 |

**Calculated logP acetone/water vs Exp. logP of SDS micelles with B3LYP**

|           |      |      |         |       |      |       |         |      |
|-----------|------|------|---------|-------|------|-------|---------|------|
| Intercept | 0.94 | 0.60 | 0.13    | -0.27 | 2.14 |       |         |      |
| x         | 0.88 | 0.24 | 4.1E-04 | 0.41  | 1.35 | 14.01 | 4.1E-04 | 0.19 |

**Calculated logP acetone/water vs Exp. logP of SDS micelles with M06-2X**

|           |      |      |         |       |      |       |         |      |
|-----------|------|------|---------|-------|------|-------|---------|------|
| Intercept | 0.38 | 0.57 | 0.51    | -0.77 | 1.52 |       |         |      |
| x         | 1.15 | 0.22 | 3.7E-06 | 0.71  | 1.59 | 27.07 | 3.7E-06 | 0.35 |

**Calculated logP 1,2-ethane diol/water vs Exp. logP of SDS micelles with B3LYP**

|           |       |      |         |       |       |  |  |  |
|-----------|-------|------|---------|-------|-------|--|--|--|
| Intercept | -1.33 | 0.38 | 9.4E-04 | -2.10 | -0.57 |  |  |  |
|-----------|-------|------|---------|-------|-------|--|--|--|

|                                                                                          |       |      |         |       |       |       |         |      |
|------------------------------------------------------------------------------------------|-------|------|---------|-------|-------|-------|---------|------|
| x                                                                                        | 0.41  | 0.15 | 0.01    | 0.12  | 0.71  | 7.71  | 7.4E-03 | 0.12 |
| <b>Calculated logP 1,2-ethane diol/water vs Exp. logP of SDS micelles with M06-2X</b>    |       |      |         |       |       |       |         |      |
| Intercept                                                                                | -1.99 | 0.43 | 3.1E-05 | -2.87 | -1.12 |       |         |      |
| x                                                                                        | 0.73  | 0.18 | 1.4E-04 | 0.37  | 1.09  | 17.02 | 1.4E-04 | 0.26 |
| <b>Calculated logP dimethyl sulfoxide/water vs Exp. logP of SDS micelles with B3LYP</b>  |       |      |         |       |       |       |         |      |
| Intercept                                                                                | 0.13  | 0.55 | 0.81    | -0.97 | 1.24  |       |         |      |
| x                                                                                        | 0.64  | 0.22 | 4.4E-03 | 0.21  | 1.07  | 8.79  | 4.4E-03 | 0.13 |
| <b>Calculated logP dimethyl sulfoxide/water vs Exp. logP of SDS micelles with M06-2X</b> |       |      |         |       |       |       |         |      |
| Intercept                                                                                | -0.57 | 0.62 | 0.37    | -1.82 | 0.68  |       |         |      |
| x                                                                                        | 1.00  | 0.26 | 2.8E-04 | 0.49  | 1.52  | 15.31 | 2.8E-04 | 0.23 |
| <b>Calculated logP formic acid/water vs Exp. logP of SDS micelles with B3LYP</b>         |       |      |         |       |       |       |         |      |
| Intercept                                                                                | -1.29 | 0.62 | 0.04    | -2.53 | -0.05 |       |         |      |
| x                                                                                        | 0.46  | 0.24 | 0.06    | -0.03 | 0.94  | 3.57  | 6.4E-02 | 0.06 |
| <b>Calculated logP formic acid/water vs Exp. logP of SDS micelles with M06-2X</b>        |       |      |         |       |       |       |         |      |
| Intercept                                                                                | -1.85 | 0.71 | 0.01    | -3.27 | -0.44 |       |         |      |
| x                                                                                        | 0.64  | 0.27 | 0.02    | 0.09  | 1.19  | 5.54  | 2.2E-02 | 0.10 |
| <b>Experimental logP octanol/water vs calculated logP octanol/water with B3LYP</b>       |       |      |         |       |       |       |         |      |
| Intercept                                                                                | 1.00  | 0.15 | 1.4E-08 | 0.70  | 1.30  |       |         |      |
| x                                                                                        | 0.67  | 0.07 | 1.3E-12 | 0.52  | 0.82  | 82.48 | 1.3E-12 | 0.60 |
| <b>Experimental logP octanol/water vs calculated logP octanol/water with M06-2X</b>      |       |      |         |       |       |       |         |      |
| Intercept                                                                                | 0.90  | 0.15 | 3.3E-07 | 0.59  | 1.22  |       |         |      |
| x                                                                                        | 0.71  | 0.07 | 1.3E-13 | 0.57  | 0.86  | 97.54 | 1.3E-13 | 0.65 |

**Table S3.** Statistical parameters obtained from the linear regressions for B3LYP and M06-2X calculations.

| <b>Molecule</b>                   | <b>Experimental LogP<sub>o/w</sub></b> |
|-----------------------------------|----------------------------------------|
| <b>Ethylbenzene</b>               | 3.15[1]                                |
| <b>Propylbenzene</b>              | 3.69[2]                                |
| <b>Butylbenzene</b>               | 4.38[2]                                |
| <b>1-phenylethanone</b>           | 1.58[3]                                |
| <b>1-phenylpropan-1-one</b>       | 2.19[4]                                |
| <b>1-phenylbutan-1-one</b>        | 2.66[4]                                |
| <b>1-phenylpentan-1-one</b>       | 3.15[5]                                |
| <b>1-phenylheptan-1-one</b>       | 4.13[4]                                |
| <b>Furan</b>                      | 1.34[6]                                |
| <b>2-nitroaniline</b>             | 1.85[2]                                |
| <b>2,3-benzofuran</b>             | 1.9[2]                                 |
| <b>Diphenylmethanone</b>          | 3.18[7]                                |
| <b>Benzamide</b>                  | 0.64[8]                                |
| <b>4-chloroaniline</b>            | 1.83[9]                                |
| <b>2,3-dimethylphenol</b>         | 2.48[10]                               |
| <b>Naphthalen-2-ol</b>            | 2.48[11]                               |
| <b>3-methylphenol</b>             | 1.96[12]                               |
| <b>2,4-dimethylphenol</b>         | 2.3[13]                                |
| <b>Naphtalene</b>                 | 3.3[14]                                |
| <b>Pyrimidine</b>                 | 1.37[15]                               |
| <b>Benzaldehyde</b>               | 1.48[16]                               |
| <b>3-chloroaniline</b>            | 1.88[17]                               |
| <b>1H-pyrrole</b>                 | 0.75[18]                               |
| <b>3-nitroaniline</b>             | 1.37[2]                                |
| <b>4-chlorophenol</b>             | 2.39[19]                               |
| <b>Phenol</b>                     | 1.46[20]                               |
| <b>Methylbenzoate</b>             | 2.12[21]                               |
| <b>Bromobenzene</b>               | 2.99[22]                               |
| <b>1,4-xylene</b>                 | 3.15[23]                               |
| <b>2-methylaniline</b>            | 1.32[24]                               |
| <b>1-methoxy-2-nitrobenzen</b>    | 1.73[25]                               |
| <b>N-4-chlorophenylacetamide</b>  | 2.41[26]                               |
| <b>Aniline</b>                    | 1.24[27]                               |
| <b>Nitrobenzene</b>               | 1.85[28]                               |
| <b>Chlorobenzene</b>              | 2.84[29]                               |
| <b>N-phenylacetamide</b>          | 2.84[9]                                |
| <b>4-nitroaniline</b>             | 1.39[2]                                |
| <b>Anisole</b>                    | 2.11[28]                               |
| <b>Benzonitrile</b>               | 1.56[28]                               |
| <b>1-ethyl-4-nitrobenzene</b>     | 3.03[30]                               |
| <b>1-methoxy-4-nitrobenzene</b>   | 2.03[31]                               |
| <b>N,N-diethyl-4-nitroaniline</b> | 3.55[32]                               |

|                        |           |
|------------------------|-----------|
| <b>Benzyl benzoate</b> | 3.97[33]  |
| <b>Caffeine</b>        | -0.07[34] |
| <b>Corticosterone</b>  | 0.94[35]  |
| <b>Cortisone</b>       | 1.47[36]  |
| <b>b-estradiol</b>     | 3.5[37]   |
| <b>Estriol</b>         | 2.45[35]  |
| <b>Cortisol</b>        | 1.61[38]  |
| <b>Hydroquinone</b>    | 0.59[39]  |
| <b>Quinoline</b>       | 2.03[28]  |
| <b>Atrazine</b>        | 2.61[40]  |
| <b>Diuron</b>          | 2.68[41]  |
| <b>Fluometuron</b>     | 2.42[42]  |
| <b>Isoproturon</b>     | 2.87[43]  |
| <b>Linuron</b>         | 3.2[44]   |
| <b>Metobromuron</b>    | 2.32[45]  |
| <b>Monuron</b>         | 1.94[46]  |
| <b>Metoxuron</b>       | 1.64[46]  |
| <b>Phenyl urea</b>     | 0.83[47]  |
| <b>Propazine</b>       | 2.93[48]  |

**Table S4.** List of experimental LogP<sub>o/w</sub> used in this study.

#### References of molecules of Table S4:

- David F. V. Lewis, Craig Sams, George D. Loizou. A quantitative structure–activity relationship analysis on a series of alkyl benzenes metabolized by human cytochrome P450 2E1. *Journal of biochemical and molecular toxicology* **2003**, 17, 47-52.
- Hai-Long Qian, Cheng Yang, Xiu-Ping Yan. Layer-by-layer preparation of 3D covalent organic framework/silica composites for chromatographic separation of position isomers. *Journal of chemical communications* **2018**, 54, 11765 – 11768.
- Ogata, Koji; Hatakeyama, Makoto; Nakamura, Shinichiro. Effect of Atomic Charges on Octanol–Water Partition Coefficient Using Alchemical Free Energy Calculation. *Journal of molecules*, **2018**, 23, 425.
- Valko, Klara; Du, Chau My; Bevan, Christopher D. Reynolds, Derek P. Abraham, Michael H. Rapid-Gradient HPLC Method for Measuring Drug Interactions with Immobilized Artificial Membrane: Comparison with Other Lipophilicity Measures. *Journal of Pharmaceutical Sciences*, **2000**, 89, 1085 – 1096.
- Kibbey, Christopher E.; Poole, Salwa K.; Robinson, Ben; Jackson, J. Derek; Durham, Douglas. An integrated process for measuring the physicochemical properties of drug candidates in a preclinical discovery environment. *Journal of Pharmaceutical Sciences*, **2001**, 90, 1164 – 1175.
- Smith; Perfetti; Garg; Hansch. IARC carcinogens reported in cigarette mainstream smoke and their calculated logP values. *Journal of Food and Chemical Toxicology*, **2003**, 41, 807 – 817.
- Van Stee; Leonards; Van Loon; Jan Hendriks; Struijs; Brinkman; Maas. Use of semi-permeable membrane devices and solid-phase extraction for the wide-range screening of microcontaminants in surface water by GC-AED/MS. *Journal of Water Research*, **2002**, 36, 4455 – 4470.
- Bas; Dorison-Duval; Moreau; Bruneau; Chipot. Rational determination of transfer free energies of small drugs across the water–oil interface. *Journal of Medicinal Chemistry*, **2002**, 45, 151 – 159.
- Stéen, E. Johanna L.; Nyberg, Nils; Lehel, Szabolcs; Andersen, Valdemar L.; Di Pilato, Pantaleo; Knudsen, Gitte M.; Kristensen, Jesper L.; Herth, Matthias M. Development of a simple proton nuclear magnetic resonance-based procedure to estimate the approximate distribution coefficient at physiological pH (log  $D_{7.4}$ ): Evaluation and comparison to existing practices. *Journal of Bioorganic and Medicinal Chemistry Letters*, **2017**, 27, 319-322.
- Miyake, Yoshikazu; Yumoto, Toshimi; Kitamura, Hajime; Sugimoto, Taichi. Solubilization of organic compounds into as-synthesized spherical mesoporous silica. *Journal of Physical Chemistry Chemical Physics*, **2002**, 4, 2680 – 2684.
- Huang; Wang; Shao; Chen; Dai; Wang. QSAR for Prediction of Joint Toxicity of Substituted Phenols to Tadpoles (Rana japonica). *Journal of Bulletin of Environmental Contamination and Toxicology*, **2003**, 71, 1124 – 1130.

12. Xie; Liu; Liu; Zhai; Wang. Determination of solubilities and n-octanol/water partition coefficients and QSPR study for substituted phenols. *Journal of Bulletin of Environmental Contamination and Toxicology*, **2008**, *80*, 319 – 323.
13. Poerschmann, Juergen; Trommler, Ulf; Nyplova, Petra; Morgenstern, Peter; Gorecki, Tadeusz. Complexation-flocculation of organic contaminants by the application of oxyhumolite-based humic organic matter. *Journal of Chemosphere*, **2008**, *70*, 1228 – 1237.
14. Stephen Brown; Akerman; Klamer; Akhtar; Villerius; Hampel; Kozin. Partition Controlled Delivery of Hydrophobic Substances in Toxicity Tests Using Poly(dimethylsiloxane) (PDMS) Films. *Journal of Environmental Science and Technology*, **2001**, *35*, 4097 – 4102.
15. Liu, Junqiu; Nile, Shivraj Hariram; Xu, Guoliang; Wang, Yuesheng; Kai, Guoyin. Systematic exploration of *Astragalus membranaceus* and *Panax ginseng* as immune regulators: Insights from the comparative biological and computational analysis. *Journal of Phytomedicine*, **2019**, *86*, 153077.
16. The Procter & Gamble Company; Sturgis, David Arthur; LI, Jianjun Justin; FLICKINGER, Marc Adam; HUTCHINS, Virginia Tzung-Hwei; DIERSING, Steven Louis; WUJEK, Steven Michael - US2018/64624, 2018, A1.
17. Schultz, T. Wayne. Structure–Toxicity Relationships for Benzenes Evaluated with *Tetrahymena pyriformis*. *Journal of Chemical Research in Toxicology*, **1999**, *12*, 1262 – 1267.
18. Xinrui Yuan, Yineng Xia, Peng Lu, Lijuan Zhu, Yuejiao Zhong, Yubin Wang. Synthesis and evaluation of 1H-pyrrole-2,5-dione derivatives as cholesterol absorption inhibitors for suppressing the formation of foam cells and inflammatory response. *Journal of Bioorganic & Medicinal Chemistry*, **2018**, *26*, 1435-1447.
19. Krátký, Martin; Jandourek, Ondřej; Baranyai, Zsuzsa; Novotná, Eva; Stolaříková, Jiřina; Bősze, Szilvia; Vinšová, Jarmila. Phenolic *N*-monosubstituted carbamates: Antitubercular and toxicity evaluation of multi-targeting compounds. *Journal of European Journal of Medicinal Chemistry*, **2019**, *181*, 111578.
20. Chang, Ya-Ting; Chang, Fang-Yi; Chen, Yi-Kwan; Lee, Ching-Ju; Yang, Chung-Sung. Water-Dragging Ability of Aromatic Compounds in Octanol-Water Systems: A Quantitative Approach by Spectra Deconvolution. *Journal of the Chinese Chemical Society*, **2009**, *56*, 279 – 288.
21. Ogata, Koji; Hatakeyama, Makoto; Nakamura, Shinichiro. Effect of Atomic Charges on Octanol-Water Partition Coefficient Using Alchemical Free Energy Calculation. *Journal of Molecules*, **2018**, *23*, 425.
22. MICAP PLC - WO2005/102045, 2005, A.
23. Lodge, Keith B.; Egyepong, Ebenezer J. Evidence for Self-Association of Nonionic and Other Organic Solutes in Liquid Phases Comprising 1-Octanol and Water. *Journal of Physical Chemistry A*, **2010**, *114*, 5131 – 5140.
24. Poduval; Kurzatowska; Stobiecka; Dehaen; Dehaen; Radecka; Radecki. Systematic study of interaction of the neutral form of anilines with undecylcalix[4]resorcinarene derivatives by means of potentiometry. *Journal of Supramolecular Chemistry*, **2010**, *22*, 413 – 419.
25. Chen, Zhi; Weber, Stephen G. High-Throughput Method for Lipophilicity Measurement. *Journal of Analytical Chemistry*, **2007**, *79*, 1043 – 1049.
26. Ruelle, Paul; Kesselring, Ulrich W. The Hydrophobic Effect. 3. A Key Ingredient in Predicting *n*-Octanol-Water Partition Coefficients. *Journal of Pharmaceutical Sciences*, **1998**, *87*, 1015 – 1024.
27. Poduval; Kurzatowska; Stobiecka; Dehaen; Dehaen; Radecka; Radecki. Systematic study of interaction of the neutral form of anilines with undecylcalix[4]resorcinarene derivatives by means of potentiometry. *Journal of Supramolecular Chemistry*, **2010**, *22*, 413 – 419.
28. Toulmin, Anita; Wood, J. Matthew; Kenny, Peter W. Toward Prediction of Alkane/Water Partition Coefficients. *Journal of Medicinal Chemistry*, **2008**, *51*, 3720 – 3730.
29. Byrns, Geoff. The fate of xenobiotic organic compounds in wastewater treatment plants. *Journal of Water Research*, **2001**, *35*, 2523 – 2533.
30. David A. Burgess and Ian D. Rae. Oxidation of Alkyl Groups Accompanying the Zinin Reduction of Nitroarenes. *Australian Journal of Chemistry*, **1977**, *30*, 927-31.
31. Zafrani, Yossi; Yeffet, Dina; Sod-Moriah, Gali; Berliner, Anat; Amir, Dafna; Marciano, Daniele; Gershonov, Eytan; Saphier, Sigal. Difluoromethyl Bioisostere: Examining the “Lipophilic Hydrogen Bond Donor” Concept. *Journal of Medicinal Chemistry*, **2017**, *60*, 797 – 804.
32. Michael Maiwald, Gerhard M. Schneider. *Solvatochromism in supercritical fluids. physical chemistry*, **1998**, *102*, 960-964.
33. Agundez, Catherine; Sellanes, Diver; Peña, Stella; Scarone, Laura; Aguiar, Anna C. C.; De Souza, Juliana O.; Guido, Rafael V. C.; (...) Sanz, Laura M.; Serra, Gloria L. Synthesis, Profiling, and in Vivo Evaluation of Cyclopeptides Containing *N*-Methyl Amino Acids as Antiplasmodial Agents. *Journal of ACS Medicinal Chemistry Letters*, **2019**, *10*, 137 – 141.
34. Soulsby, David. Band-selective excitation NMR spectroscopy and quantitative time-domain analysis using Complete Reduction to Amplitude-Frequency Table (CRAFT) to determine distribution coefficients during drug development. *Journal of Magnetic Resonance in Chemistry*, **2019**, *57*, 953 – 960.

35. Chen, Chen-Peng; Chen, Chan-Cheng; Huang, Chia-Wen; Chang, Yen-Ching. Evaluating Molecular Properties Involved in Transport of Small Molecules in Stratum Corneum: A Quantitative Structure-Activity Relationship for Skin Permeability. *Journal of Molecules*, **2018**, 23, 911.
36. Tartaglia, Angela; Locatelli, Marcello; Kabir, Abuzar; Furton, Kenneth G.; Macerola, Daniela; Sperandio, Elena; Piccolantonio, Silvia; (...) Croce, Fausto; Samanidou, Victoria F. Comparison between Exhaustive and Equilibrium Extraction Using Different SPE Sorbents and Sol-Gel Carbowax 20M Coated FPSE Media. *Journal of Molecules*, **2019**, 24, 382.
37. Nguyen, Anh; Top, Siden; Pigeon, Pascal; Vessieres, Anne; Hillard, Elizabeth A.; Plamont, Marie-Aude; Huche, Michel; Rigamonti, Clara; Jaouen, Gerard. Synthesis and Structure-Activity Relationships of Ferrocenyl Tamoxifen Derivatives with Modified Side Chains. *Journal of Chemistry - A European Journal*, **2009**, 15, 684-696.
38. Haraguchi, Tamami; Uchida, Takahiro; Yoshida, Miyako; Kojima, Honami; Habara, Masaaki; Ikezaki, Hidekazu. The Utility of the Artificial Taste Sensor in Evaluating the Bitterness of Drugs: Correlation with Responses of Human TASTE2 Receptors (hTAS2Rs). *Journal of Chemical and Pharmaceutical Bulletin*, **2018**, 66, 71 - 77.
39. Boge; Roche. Cytotoxicity of Phenolic Compounds on *Dicentrarchus labrax* Erythrocytes. *Journal of Bulletin of Environmental Contamination and Toxicology*, **1996**, 57, 171 - 178.
40. Jin, Yushen; Qi, Yan; Tang, Chu; Shao, Bing. Hierarchical micro- and mesoporous metal-organic framework-based magnetic nanospheres for the nontargeted analysis of chemical hazards in vegetable. *Journal of Materials Chemistry A*, **2021**, 9, 9056 - 9065.
41. Gonec, Tomas; Kralova, Katarina; Pesko, Matus; Jampilek, Josef. Antimycobacterial N-alkoxyphenylhydroxynaphthalenecarboxamides affecting photosystem II. *Journal of Bioorganic and Medicinal Chemistry Letters*, **2017**, 27, 1881 - 1885.
42. Locke, Martin A.; Zablotowicz, Robert M.; Steinriede, R. Wade; Kingery, William L. Degradation and Sorption of Fluometuron and Metabolites in Conservation Tillage Soils. *Journal of Agricultural and Food Chemistry*, **2007**, 55, 844 - 851.
43. Guardo, Antonio Di; Williams, Richard J.; Matthiessen, Peter; Brooke, David N.; Calamari, Davide. Simulation of pesticide runoff at Rosemaund Farm (UK) using the SoilFug model. *Journal of Environmental Science and Pollution Research*, **1994**, 1, 151 - 160.
44. Hu, Jian-Ying; Aizawa, Takako; Ookubo, Yutaka; Morita, Takeshi; Magara, Yasumoto. Adsorptive characteristics of ionogenic aromatic pesticides in water on powdered activated carbon. *Journal of Water Research*, **1998**, 32, 2593 - 2600.
45. Liu, Jianbo; Qian, Chuanfan. Hydrophobic coefficients of s-triazine and phenylurea herbicides. *Journal of Chemosphere*, **1995**, 31, 3951 - 3959.
46. Green, Caroline E.; Abraham, Michael H.; Acree, William E.; Fina, Karin M. De; Sharp, Tina L. Solvation descriptors for pesticides from the solubility of solids: diuron as an example. *Journal of Pest Management Science*, **2000**, 56, 1043 - 1053.
47. Dorosti, Niloufar; Delfan, Bahram; Gholivand, Khodayar; Ebrahimi Valmoozi, Ali Asghar. Synthesis, crystal structure, biological evaluation, electronic aspects of hydrogen bonds, and QSAR studies of some new N-(substituted phenylurea) diazaphosphore derivatives as anticancer agents. *Journal of Medicinal Chemistry Research*, 2016, **25**, 769 - 789.
48. Mibu, Nobuko; Yokomizo, Kazumi; Yuzuriha, Ai; Otsubo, Marie; Kawaguchi, Yuna; Sano, Marina; Sakai, Izumi; Nakayama, Keita; Zhou, Jian-Rong; Sumoto, Kunihiro. Antiviral activities of some new 2,4,6-trisubstituted 1,3,5-triazines having alkoxy and/or alkylamino groups. *Journal of Heterocycles*, **2017**, 94, 1653 - 1677.



**Equations** of the statistical measures used in the analysis: mean absolute error (**MAE**), mean square error (**MSE**), and root mean square error (**RMSE**) in Eq. S1, S2 and S3, respectively.

$$\text{MAE} = \frac{\sum_{i=1}^n |y_i - x_i|}{n} \quad (\text{S1})$$

$$\text{MSE} = \frac{\sum_{i=1}^n (y_i - x_i)^2}{n} \quad (\text{S2})$$

$$\text{RMSE} = \sqrt{\frac{\sum_{i=1}^n (y_i - x_i)^2}{n}} \quad (\text{S3})$$

where  $y_i$  is the prediction,  $x_i$  the experimental value and  $n$  the number of observations.
